# Supplementary material for: The oxygen reduction reaction mechanism on Sn doped graphene as an electrocatalyst in fuel cells: a DFT study
Source: Royal Society of Chemistry journal article supplement (doi:10.1039/c6ra25118h), 2017-01-01
Supplement: c6ra25118h1.pdf [file c6ra25118h1.pdf]

## Supporting Information

### **The oxygen reduction reaction mechanism on Sn doped graphene as an electrocatalyst in fuel cells: A DFT study**

Xiaoxu Sun,<sup>a, b</sup> Kai Li,<sup>a</sup> Cong Yin,<sup>c</sup> Ying Wang,<sup>a</sup> Feng He,<sup>a, b</sup> Xiaowan Bai,<sup>a</sup> Hao  
Tang,<sup>\*c</sup> and Zhijian Wu<sup>\*a</sup>

*<sup>a</sup>State Key Laboratory of Rare Earth Resource Utilization, Changchun Institute of  
Applied Chemistry, Chinese Academy of Sciences, Changchun 130022, P. R. China*

*<sup>b</sup>University of Science and Technology of China, Hefei, Anhui 230026, P. R. China*

*<sup>c</sup>Energy Conversion R&D Center, Central Academy of Dongfang Electric  
Corporation, Chengdu 611731, P. R. China*

\* Corresponding authors. E-mail: [tanghao@dongfang.com](mailto:tanghao@dongfang.com) (HT); [zjwu@ciac.ac.cn](mailto:zjwu@ciac.ac.cn)  
(ZJW).

**Optimized adsorption structure --- O<sub>2</sub>**

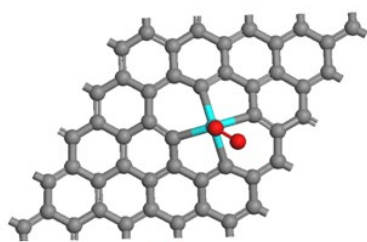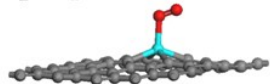

**$E_{\text{ads}} = -0.40 \text{ eV}$**

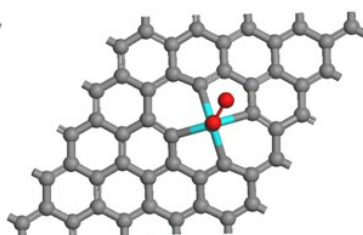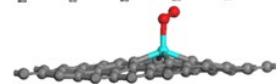

**$E_{\text{ads}} = -0.36 \text{ eV}$**

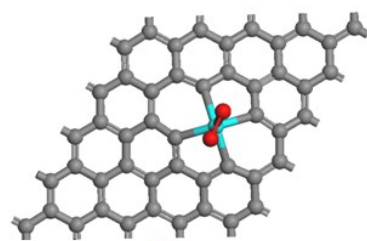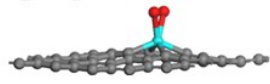

**$E_{\text{ads}} = 0.15 \text{ eV}$**

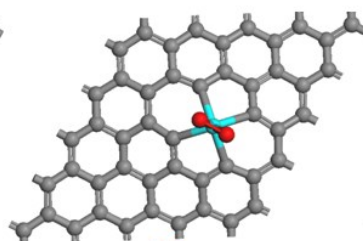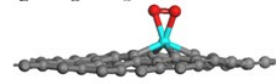

**$E_{\text{ads}} = 0.15 \text{ eV}$**

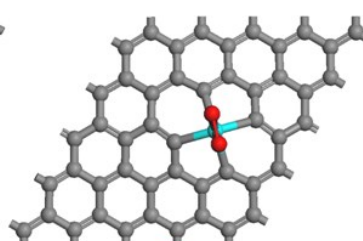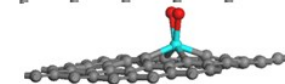

**$E_{\text{ads}} = 0.16 \text{ eV}$**

## Optimized adsorption structure --- O

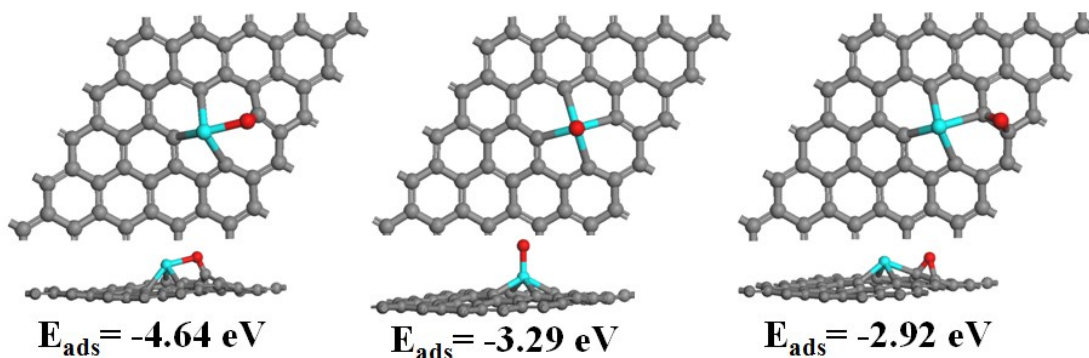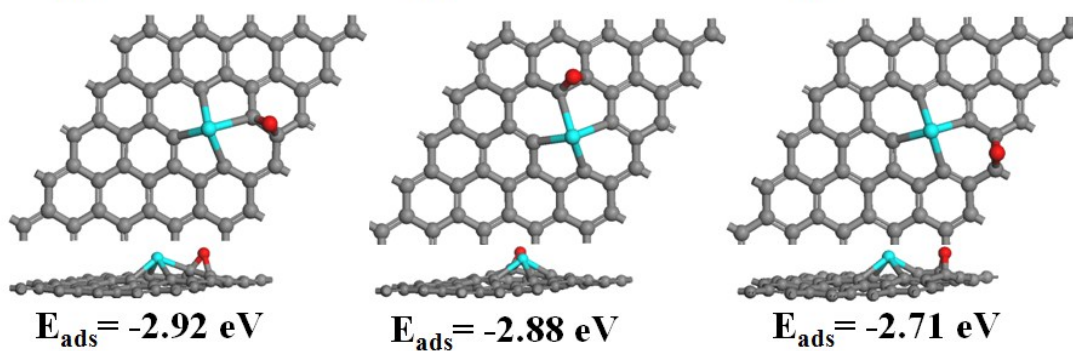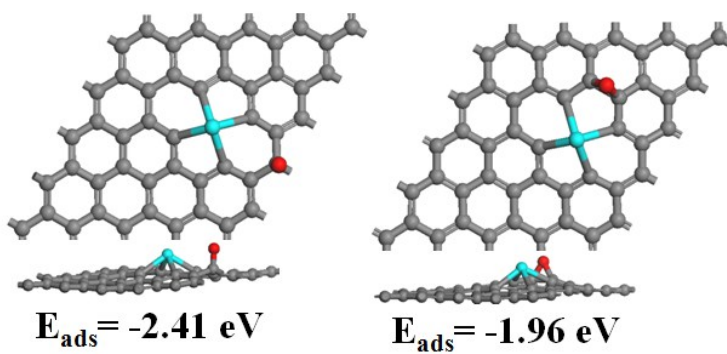

### Optimized adsorption structure --- H

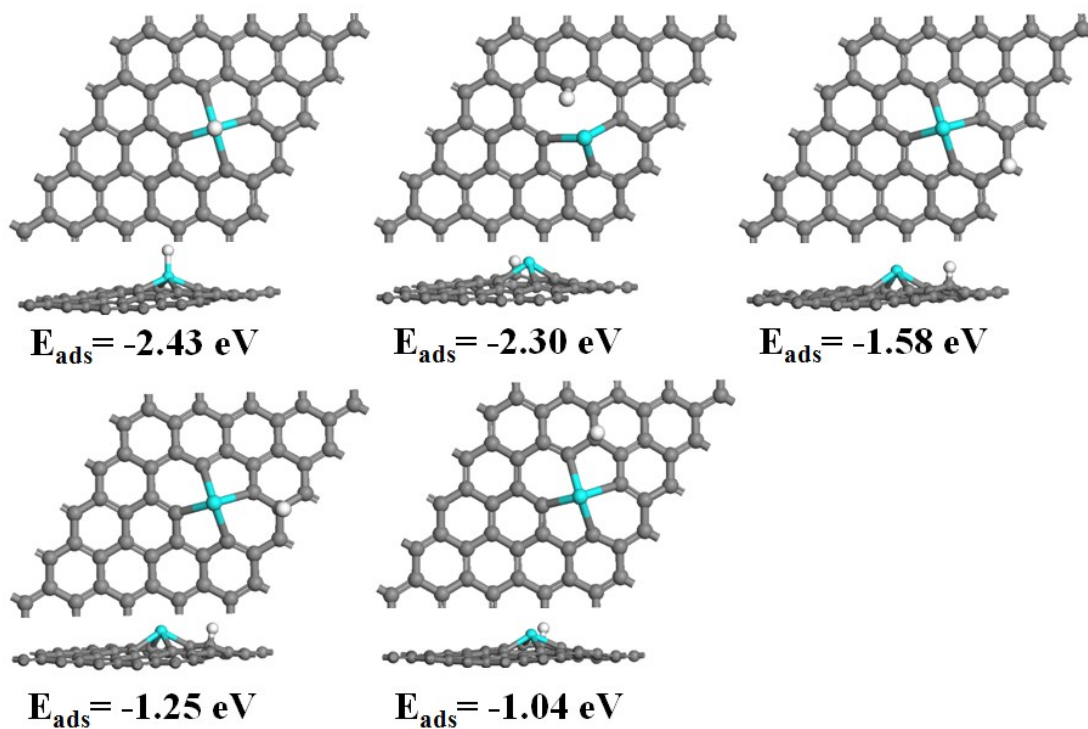

### Optimized adsorption structure --- OH

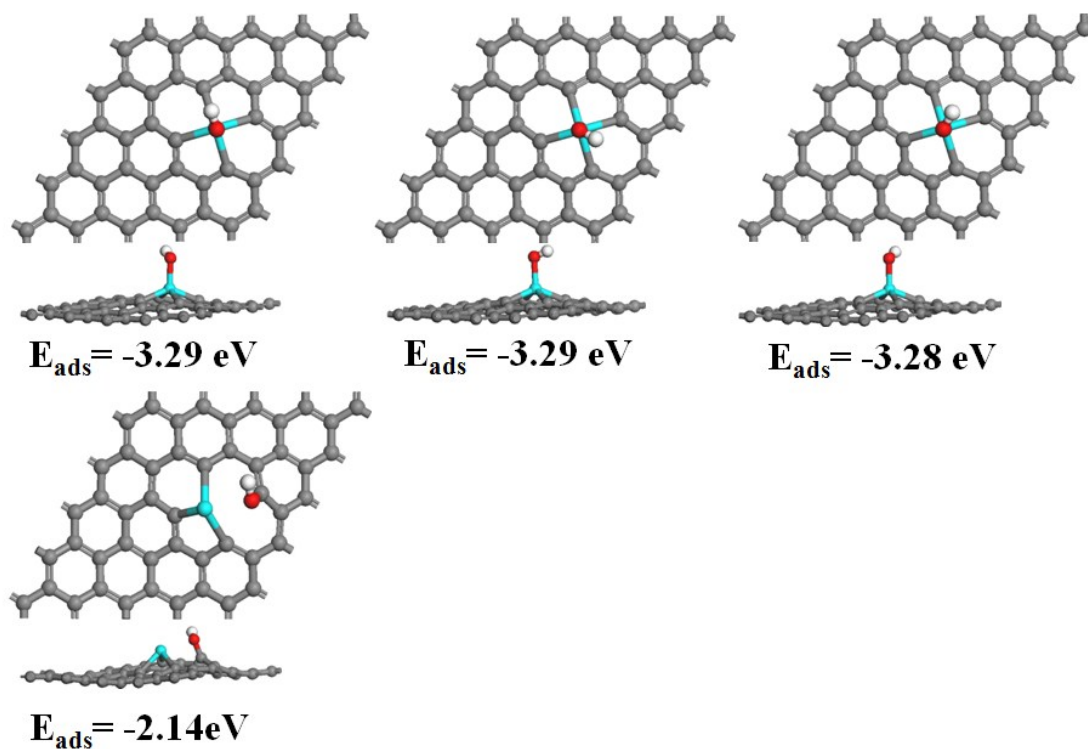

### Optimized adsorption structure --- OOH

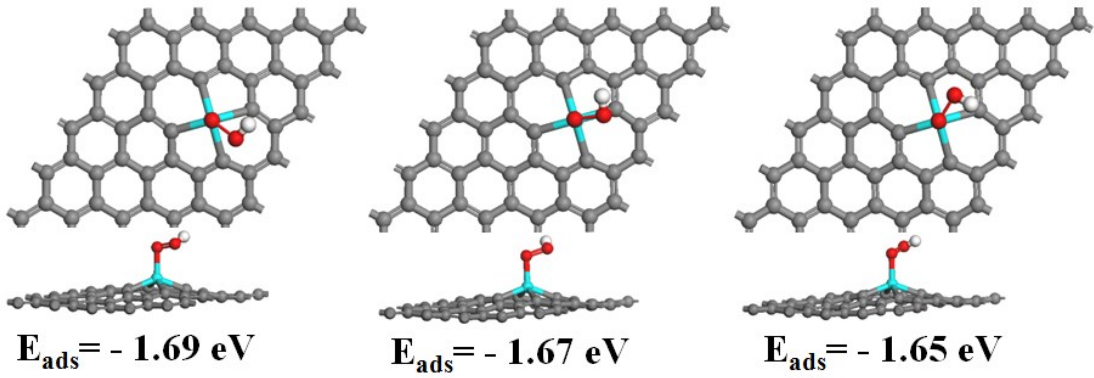

### Optimized adsorption structure --- H<sub>2</sub>O

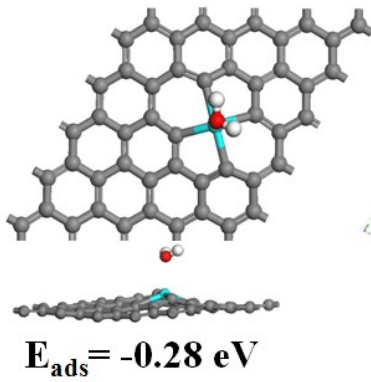

### Optimized adsorption structure --- O-O

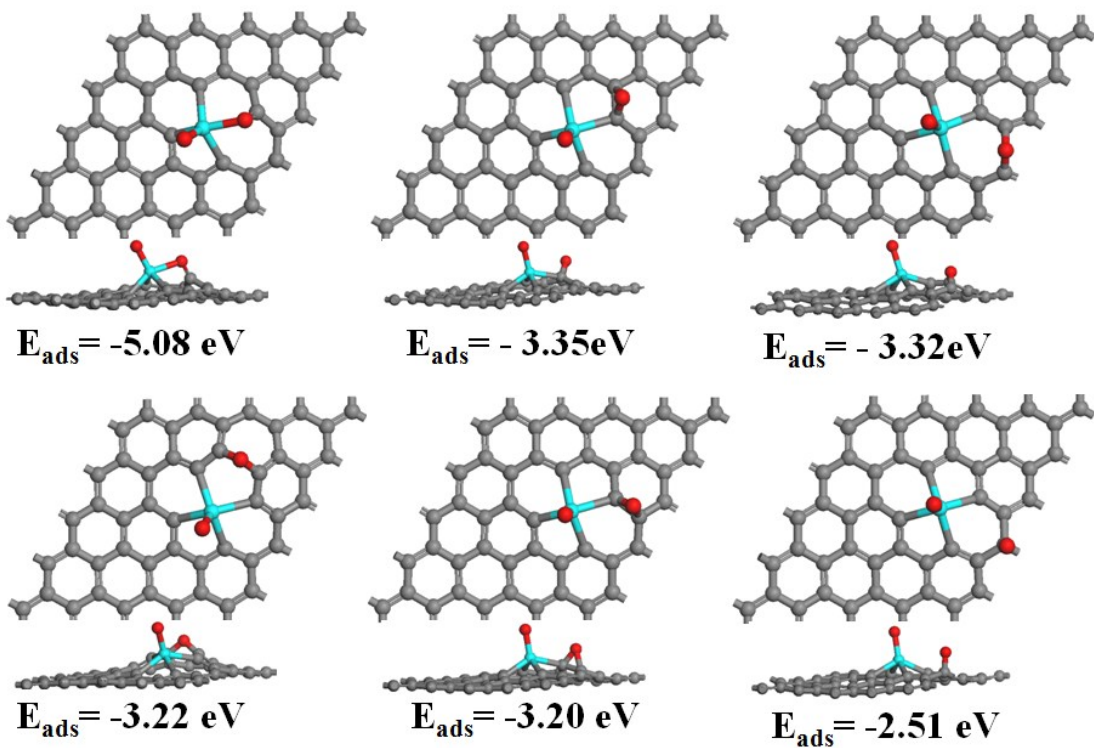

## Optimized adsorption structure --- O-OH

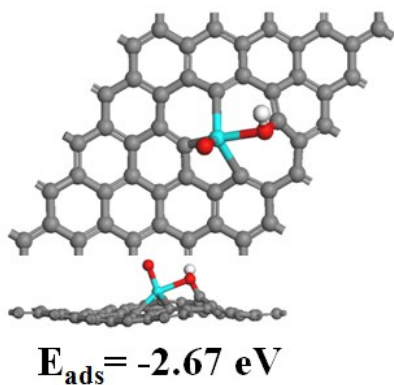

**Fig. S1.** Possible configurations for each adsorbed species (end-on O<sub>2</sub>, side-on O<sub>2</sub>, O, H, OH, OOH, H<sub>2</sub>O, O-O and O-OH) involved in the ORR on Sn doped divacancy graphene.  $E_{\text{ads}}$  represents the adsorption energy (eV). The gray and blue balls represent C and Sn atoms, respectively.

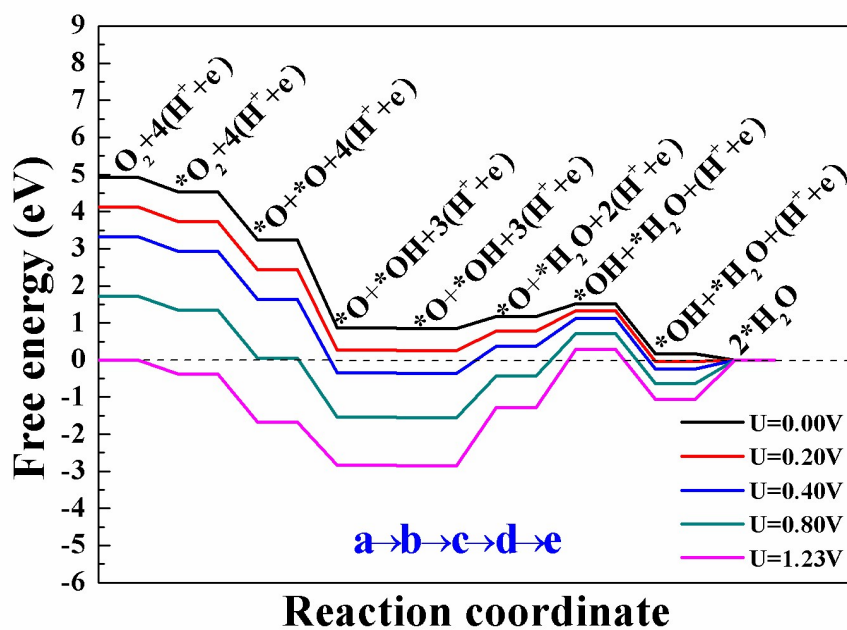

**Fig. S2.** The free energy diagram for the reaction pathway I ( $a \rightarrow b \rightarrow c \rightarrow d \rightarrow e$ ) on Sn doped divacancy graphene at different electrode potentials.



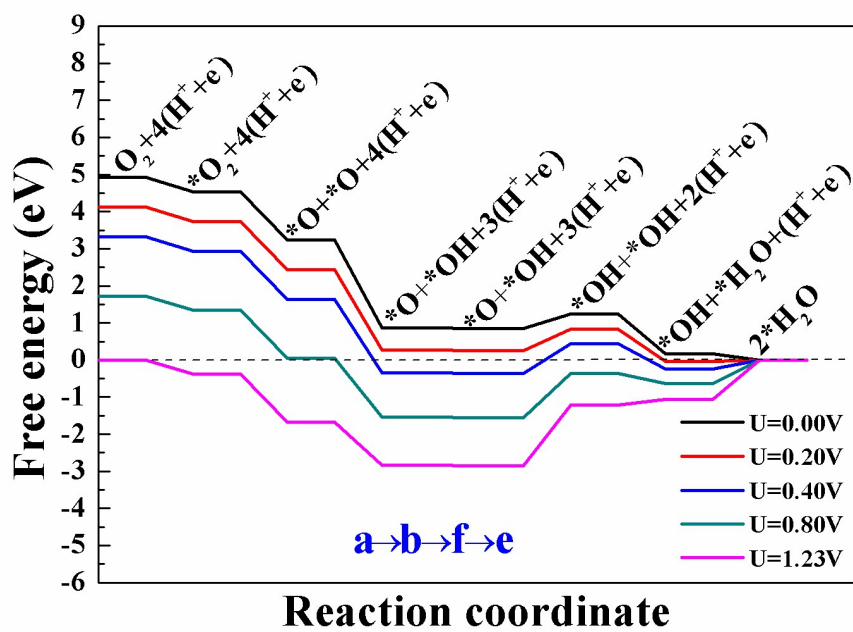

**Fig. S3.** The free energy diagram for the reaction pathway II ( $a \rightarrow b \rightarrow f \rightarrow e$ ) on Sn doped divacancy graphene at different electrode potentials.
